# Supplementary material
Source: publisher figshare collection journal article supplement (https://springernature.figshare.com/ndownloader/files/13259381)
Supplement: Supplementary file 1 [file 13259381]

**Data Table**

**Historical Data on Cardiovascular Health in Surinamese Men**

Short title: Cardiovascular Health in Surinamese Men

Brewster LM, MD PhD1; Brewster J, MSc2

1Creatine Kinase Foundation Amsterdam, The Netherlands

2Diaconessen Hospital, Paramaribo, Suriname

Corresponding author: Lizzy M. Brewster MD, PhD; Creatine Kinase Foundation.

E-mail: [mail@lizzybrewster.net](mailto:mail@lizzybrewster.net)

**Table. Selected cardiovascular risk factors in men, Paramaribo, Suriname**

| **Parameter** | **1973†** | **2013** |
| --- | --- | --- |
| n | 243 | 429 |
| Sample size (‰) | 1.6 | 1.7 |
| Sampling method | Visitors of a trade fair | Random households |
| African ancestry (%) | 55 | 40 |
| Regular leisure exercise (%)* | 32 | 25 |
| Ever smoked tobacco (%) | 52 | 55 |
| Hypertension (%) | 44 | 41 |
| Diabetes (%) | 13 | 13 |
| **Legend**  1973, 2013 are the years the population samples were drawn. †Recently retrieved previously unpublished data.n, the sample size; in pro mille of the population of Paramaribo. *At least one hour per week of `sport exercise´ in the 1973 study and of `leisure-time exercise´ in the 2013 study. | | |
